# Supplementary material for: Nucleosome remodeling at origins of global genome–nucleotide excision repair occurs at the boundaries of higher-order chromatin structure
Source: PubMed Central journal article supplement — Genome Res. 2019 Jan;29(1):74–84. doi: 10.1101/gr.237198.118 (PMC6314166; doi:10.1101/gr.237198.118), 2019-01
Supplement: supp_gr.237198.118_Supplemental_Figure_S1.pdf [file supp_gr.237198.118_Supplemental_Figure_S1.pdf]

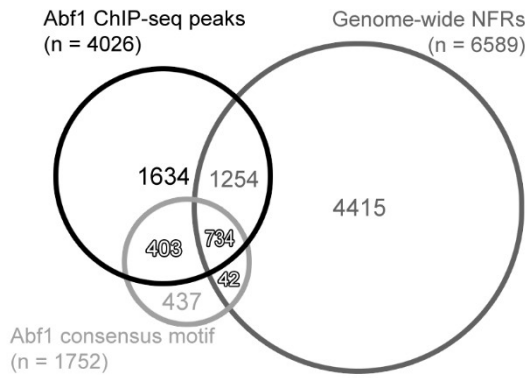

Figure S1 – Identification of GG-NER complex binding sites derived from Abf1 ChIP-seq peaks, genome-wide NFRs and Abf1 consensus sequence sites. The Venn diagram presented here subcategorises the ChIP-seq Abf1 binding sites into classes based on their localisation to NFRs (n = 6,589) and/or Abf1 consensus motifs (n = 1,752). This Venn is used to identify GCBS's as described in Figure 2A. The numbers indicate precisely overlapping events for each category.
