# Supplementary material for: Nucleosome remodeling at origins of global genome–nucleotide excision repair occurs at the boundaries of higher-order chromatin structure
Source: PubMed Central journal article supplement — Genome Res. 2019 Jan;29(1):74–84. doi: 10.1101/gr.237198.118 (PMC6314166; doi:10.1101/gr.237198.118), 2019-01
Supplement: supp_gr.237198.118_Supplemental_Figure_S2.pdf [file supp_gr.237198.118_Supplemental_Figure_S2.pdf]

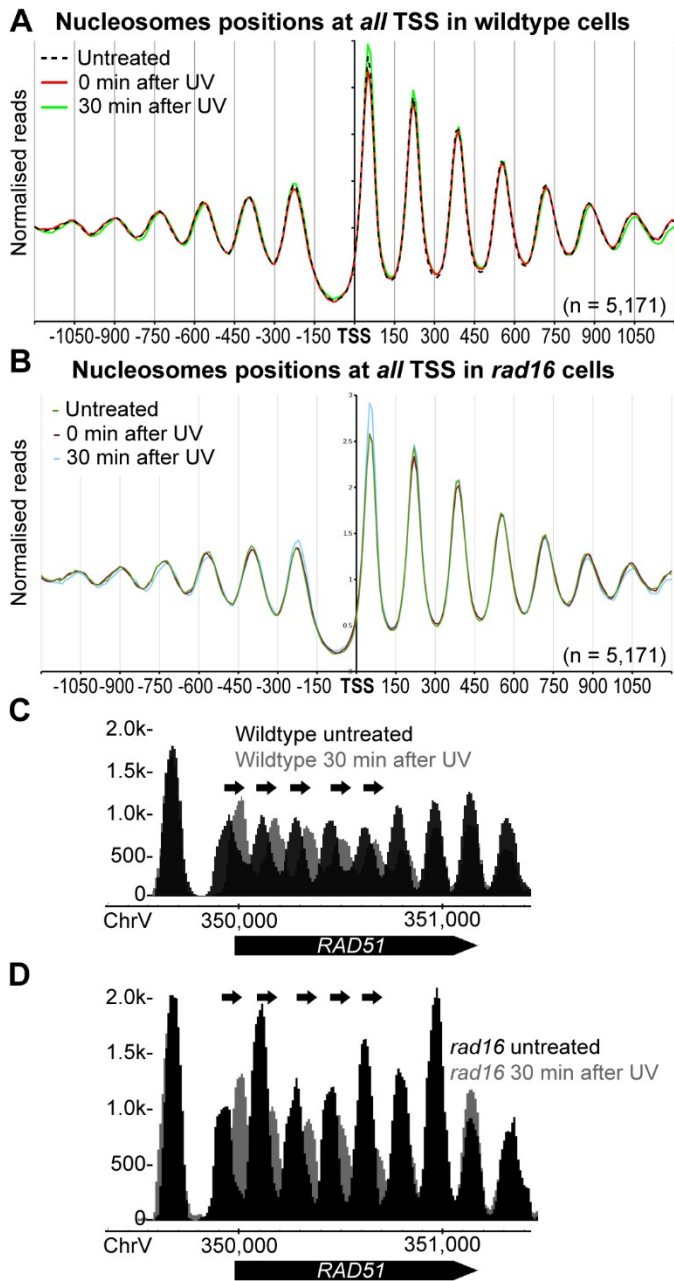

Figure S2 – Nucleosome occupancy around all TSS in yeast does not change in response to UV irradiation. A) Composite plot of nucleosomes positions relative to all TSS (n = 5,171). Genome-wide MNase-seq data was used to aggregate nucleosome positioning in relation to TSS positions in wild type cells before and after UV irradiation. B) As described in (A), but now presenting data from *RAD16* deleted cells. C) UV-induced changes in nucleosome positions at the DNA damage inducible gene *RAD51*, shows sliding of nucleosomes after irradiation. D) As described in (C), here displaying the UV-induced nucleosome sliding around *RAD51* still observed in *RAD16* deleted GG-NER defective cells.
