# Supplementary material for: Nucleosome remodeling at origins of global genome–nucleotide excision repair occurs at the boundaries of higher-order chromatin structure
Source: PubMed Central journal article supplement — Genome Res. 2019 Jan;29(1):74–84. doi: 10.1101/gr.237198.118 (PMC6314166; doi:10.1101/gr.237198.118), 2019-01
Supplement: supp_gr.237198.118_Supplemental_Figure_S4.pdf [file supp_gr.237198.118_Supplemental_Figure_S4.pdf]

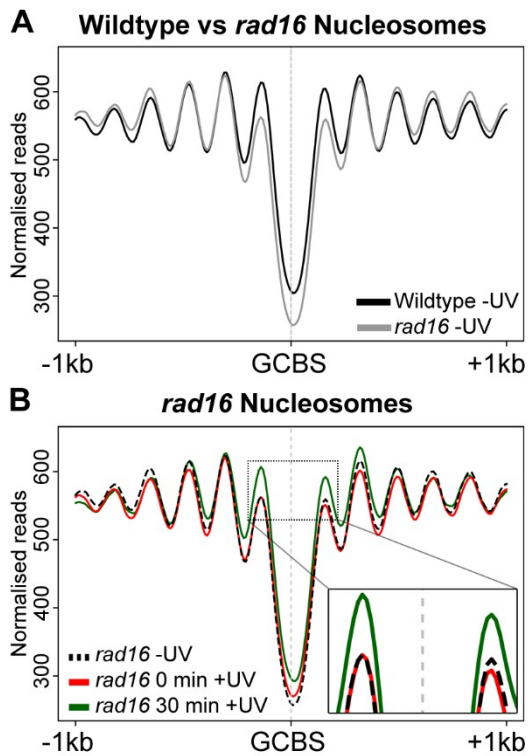

Figure S4 – Nucleosome occupancy and UV-induced chromatin remodeling at GCBS's is GG-NER dependent. A) Composite plots centred at GCBS positions are shown here depicting the nucleosome data from both wild type and *RAD16* deleted GG-NER defective cells. B) As described in A, plotting MNase-seq data from *RAD16* deleted GG-NER defective cells both before and after UV irradiation.
