# Supplementary material for: Nucleosome remodeling at origins of global genome–nucleotide excision repair occurs at the boundaries of higher-order chromatin structure
Source: PubMed Central journal article supplement — Genome Res. 2019 Jan;29(1):74–84. doi: 10.1101/gr.237198.118 (PMC6314166; doi:10.1101/gr.237198.118), 2019-01
Supplement: supp_gr.237198.118_Supplemental_Figure_S5.pdf [file supp_gr.237198.118_Supplemental_Figure_S5.pdf]

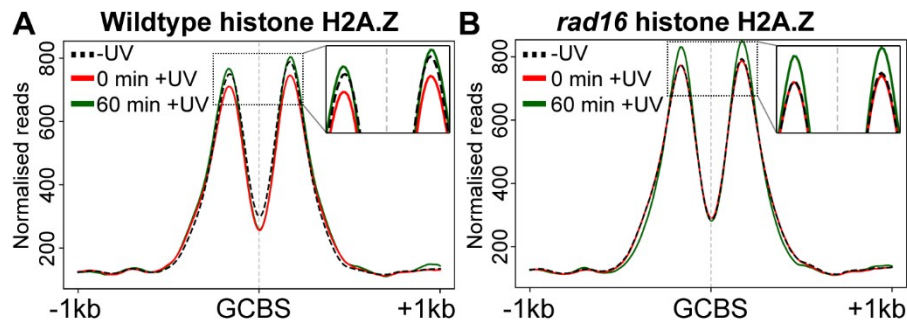

Figure S5 – GCBS-adjacent nucleosomes contain histone H2A.Z that are remodeled in response to UV irradiation. A) H2A.Z occupies nucleosomes adjacent to GCBS's (n = 2,664), plotted here from ChIP-seq data measuring H2A.Z before and 0 or 60 minutes after UV irradiation. The x-axis represents the GCBS's and 1 kbp either side of these positions. H2A.Z occupancy is quantified as normalised ChIP-seq reads on the y-axis. B) As described in A, but plotting H2A.Z nucleosomes in *RAD16* deleted cells in response to UV irradiation.
