# Supplementary material for: Nucleosome remodeling at origins of global genome–nucleotide excision repair occurs at the boundaries of higher-order chromatin structure
Source: PubMed Central journal article supplement — Genome Res. 2019 Jan;29(1):74–84. doi: 10.1101/gr.237198.118 (PMC6314166; doi:10.1101/gr.237198.118), 2019-01
Supplement: supp_gr.237198.118_Supplemental_Figure_S6.pdf [file supp_gr.237198.118_Supplemental_Figure_S6.pdf]

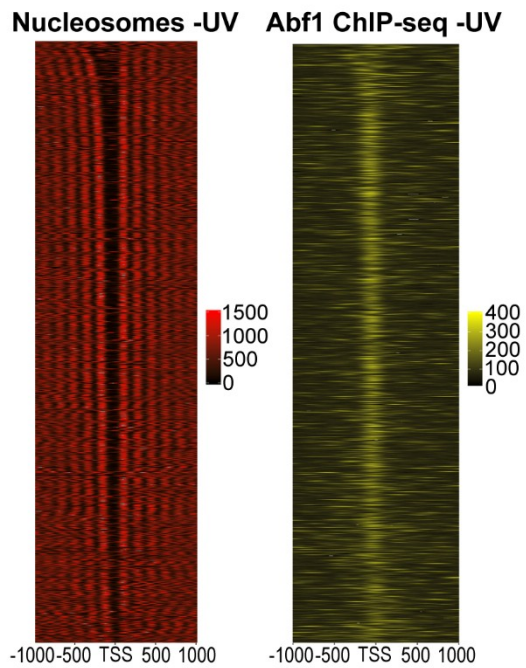

Figure S6 – Nucleosome positions (left panel) and Abf1 chromatin occupancy (right panel) in relation to TSS's is related to the variation in the width of NFR. Nucleosome data and Abf1 ChIP-seq data from Figure 6A are plotted at GCBS-associated TSS's as a heatmap. The intensity is a measure of occupancy in reads indicated to the right of each heatmap. Plots were generated using SeqPlots and transferred into the R-statistical environment. Here the nucleosome traces were sorted by NFR-size from widest (top) to narrowest (bottom).
