# Supplementary material for: Nucleosome remodeling at origins of global genome–nucleotide excision repair occurs at the boundaries of higher-order chromatin structure
Source: PubMed Central journal article supplement — Genome Res. 2019 Jan;29(1):74–84. doi: 10.1101/gr.237198.118 (PMC6314166; doi:10.1101/gr.237198.118), 2019-01
Supplement: supp_gr.237198.118_Supplemental_Figure_S7.pdf [file supp_gr.237198.118_Supplemental_Figure_S7.pdf]

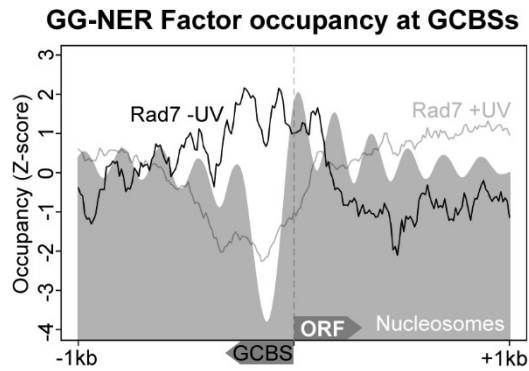

Figure S7 – The Rad7 component of the GG-NER complex binds to chromatin in the absence of UV irradiation and is redistributed in response to DNA damage. Rad7 binding is assessed here by plotting Rad7 ChIP-chip data (Yu et al. 2016) plotted at GCBS-associated genes. The data is Z-score converted to align the Rad7 ChIP-chip and MNase-seq data on the same y-axis. The nucleosome data at these positions is presented by the grey shaded area. The x-axis denotes the 2 kbp window surrounding the GCBS and the associated ORF.
