# Supplementary material for: Nucleosome remodeling at origins of global genome–nucleotide excision repair occurs at the boundaries of higher-order chromatin structure
Source: PubMed Central journal article supplement — Genome Res. 2019 Jan;29(1):74–84. doi: 10.1101/gr.237198.118 (PMC6314166; doi:10.1101/gr.237198.118), 2019-01
Supplement: supp_gr.237198.118_Supplemental_Figure_S8.pdf [file supp_gr.237198.118_Supplemental_Figure_S8.pdf]

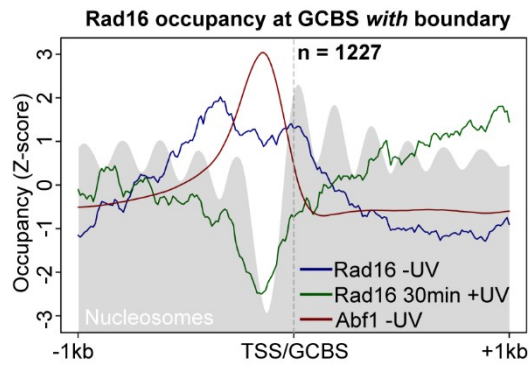

Figure S8 – GG-NER complex binding to chromatin around GCBS-associated CID boundaries in relation to promoter regions. Genomic positions of GCBS-associated CID-boundary regions were used to plot the genome-wide Abf1 ChIP-seq and Rad16 ChIP-chip data (Yu et al. 2016) at TSS's to map the location of complex binding in relation to gene structure and nucleosome positions at these genomic locations. Redistribution of Rad16, 30 minutes after UV irradiation is shown in green. The grey nucleosome trace represents nucleosome occupancy in the absence of UV irradiation at these loci. The y-axis represents the Z-score to compare data from different platforms in the same plot.
