# Supplementary material for: Nucleosome remodeling at origins of global genome–nucleotide excision repair occurs at the boundaries of higher-order chromatin structure
Source: HighWire-hosted journal article supplement (doi:10.1101/gr.237198.118), 2018-12-14
Supplement: Supplementary_Methods.docx [file Supplementary_Methods.docx]

Supplementary methods

# Yeast strain construction

To delete the *RAD16* gene from the HA-Htz1 tagged W303-1B strain, we used a *RAD16::HIS3* disruption construct residing on pUC18. The pUC18 *RAD16::HIS3* plasmid(Reed et al. 1998) was digested using EcoRI and BamHI and used for transforming the relevant yeast strain. We used lithium-acetate transformation and selected for successful genomic integration of the disruption construct on His- selection plates. From the transformation plate 12 individual colonies were restreaked on fresh media for single colony PCR and confirmation of UV phenotype. Successful clones were stored as glycerol stocks and used for the detection of genome-wide H2A.Z occupancy using ChIP-seq in the absence of *RAD16* in this study.

# UV irradiation, yeast cell culture and crosslinking

Yeast cells were grown, and UV irradiated as described previously (Yu, 2011, Yu 2016). Briefly, cells were grown to log-phase and resuspended in ice-cold 1x PBS to 2x107 cells/ml. Using 10 J/m2s1, cells were irradiated with 100 J/m2 UV-C (254 nm). The cell suspension was kept in the dark to prevent photoreactivation and cells were spun down and resuspended in fresh YPD and incubated at 30°C to allow repair to take place. After the indicated repair time in YPD, cells were treated with formaldehyde to a final concentration of 1% to crosslink protein-DNA complexes for both ChIP-seq and MNase-seq analysis. The reaction was quenched in a final concentration of 125 mM Glycine. The cells were harvested by centrifugation and washed with ice-cold 1x PBS for 2 times. The final wash was performed using cold FA/SDS (50mM HEPES KOH pH 7.5, 150mM NaCl, 1mM EDTA, 1% Triton X-100, 0.1%, NaDeoxycholate, 0.1% SDS, 1mM PMSF) and the cells were transferred to a 2 mL Eppendorf tube. After pelleting the cells, they were snap-frozen in liquid nitrogen for long term storage.

# Chromatin preparation

Chromatin extracts were prepared as described previously (Teng, 2010, Yu 2011, Yu 2016). Briefly, cells were collected by centrifugation and prepared for lysis by bead-beating in FA/SDS (+PMSF) using 0.5 mL of glass beads for 10 minutes at 4ºC. The whole cell extract was then sonicated with a Bioruptor (Diagenode) as described previously (Teng, 2010), after which the chromatin extract was collected by centrifugation. The chromatin extract is now ready for quantification and chromatin immunoprecipitation.

# Chromatin Immunoprecipitation

ChIP was performed as described previously (Powel 2015, Yu, 2011, Yu 2016). In summary, pre-washed Protein G Dynabeads™ (Invitrogen) were incubated with the optimal amount of monoclonal antibody (2 μg anti HA antibody Millipore, 05–904 or 3 μganti Abf1 antibody yC-20 [Santa Cruz Biotechnology]) in 50 μL of PBS-BSA (0.1%) for 30 min at 30oC in an Eppendorf thermomixer. The beads were then collected, washed and resuspended in 50 μL of PBS-BSA (0.1%) per sample and combined with 30 μL of 10x PBS-BSA (10mg/ml) and 300 μg of sonicated chromatin (~100-200 μL). The final volume was made up to 300 μL using PBS. The IP was performed at 21oC for 3 hours at 1300rpm in an Eppendorf thermomixer. Following this incubation, the samples were washed after which DNA was eluted in 125 μL of pronase buffer (25mM Tris pH 7.5, 5mM EDTA, 0.5% SDS) at 65oC at 900rpm for 30 min. Finally, pronase (Roche) was added to each sample and the cross-linking was reversed by incubating the samples at 65oC in a water bath overnight. Input samples containing 1/10th of IP sample were treated with pronase in parallel and incubated overnight as the IP samples. IP and input samples were treated with DNase-free RNase A (10mg/ml). For IP samples DNA was purified using the PureLinkTM Quick PCR Purification Kit (Invitrogen) and eluted with 50 μL elution buffer.

**Micrococcal nuclease digestion**

MNase digest was performed as described previously (Kent et al. 2011). Briefly, yeast cells were UV treated as described earlier, except the final wash was not performed using FA/SDS but PBS. The pellet was resuspended in 250 μL 1 M Sorbitol for treatment with yeast lytic enzyme (YLE). YLE is prepared in a 200 μL volume containing 22.5 mg/mL YLE, 11.25 M 2-mercaptoethanol and 1 M sorbitol. The cells are treated for 3 min at room temperature. The cells were pelleted by pulse spin at 12,000 rcf in a microcentrifuge and washed carefully with 1 M sorbitol. The cells were pelleted again by pulse spin at 12,000 rcf, with the tubes now rotated 180º. After carefully removing the supernatant the cell pellet is ready for MNase treatment. Add 400 μL of digestion buffer containing 1 M sorbitol, 50 mM NaCl, 10 mM Tris-HCl (pH7.5), 5 mM MgCl2, 1 mM CaCl2, 1 mM 2-mercaptoehanol, 0.5 mM spermidine, 0.075 % Nonidet P40, transfer to a 1.5 mL Eppendorf tube and add 4 μL of 30 U/μL MNase. Treat with MNase for 10 min at 37ºC. The reaction can be terminated by adding a solution of 5% SDS and 250 μM EDTA. After RNase and pronase treatment the samples were incubated at 65ºC overnight to reverse the protein-DNA cross-links. Finally, the DNA was recovered use phenol/chloroform extraction, ethanol precipitation and Invitrogen PCR kit purification, eluting the DNA in a final volume of 50 μL.

**Library preparation**

We use ≤10 ng of ChIP DNA, quantified by using the Qubit® 2.0 Fluorometer. When samples are below the detection limit of the Qubit®, we used all of the ChIP DNA (40-50 µL).

## **PreCR repair**

## Take 40 μL or ≤10ng of IP samples and 10 ng of Input samples diluted into 40 μL with ddH2O in a 1.5-mL Eppendorf LoBind® Tube and add the PreCR repair mixture (NEB). Incubate the reaction for 20 min at 37°C. Purify the DNA with magnetic beads using 1.8x sample volume of beads (CleanNA) according to the Life Technologies ChIP-seq protocol. It is important to use freshly (same day) prepared 70% ethanol for washing the beads for each purification. Elute in 50 μL low TE.

**End-repair & Blunt Ending**

Use T4 DNA polymerase for end-repair and blunt ending. Combine 0.2 μL of T4 DNA polymerase (3,000 U/μL) in 1x NEB buffer 2 with 1.0 μL dNTPs (10mM) and 0.6 μL BSA (20 mg/ml) and 50 μL ChIP DNA in an end-volume of 120 μL. Mix by pipetting and incubate for 30 min at room temperature. Purify the DNA using magnetic beads using 1.8x sample volume of beads (CleanNA) according to the Life Technologies ChIP-seq protocol. Elute in 40 μL low TE. The DNA can be stored at 4°C at this point.

**Ligation**

Prepare ligation mixtures using T4 DNA ligase (NEB, 400 U/μL) and the universal P1 adapter and A barcoded adapter and 10x Ligase buffer in an end-volume of 100 μL according to the Life Technologies ChIP-seq protocol. It is important to be careful and not to contaminate the barcoded adapters. Ligate for 30 min at room temperature. Note, this step is critical, longer incubations introduce adapter-adapter concatamers that get amplified during the next step. Purify the ligated DNA using magnetic beads using 1.5x sample volume of beads (CleanNA) according to the Life Technologies ChIP-seq protocol and elute in 40 µL low TE (the Life Tech protocol elutes in 20 µL). DNA can be stored at 4°C at this point.

## **Nick Repair & Amplification**

## Use Q5 High Fidelity polymerase (NEB) to perform the nick repair reaction and amplification steps. These steps are performed in an end-volume of 100 µL. Combine 40 μL ChIP DNA with 2 units of Q5 HF polymerase and 1 μL forward and 1 μL reverse amplification primers (20 μM), 20 μL 5x Q5 reaction buffer, 2.5 μL dNTPs (10 mM), make up to 100 μL using ddH2O and mix by pipetting up and down. Place the tubes into a thermal cycler and run the following PCR cycling program.

PCR Program:

| **Step** | **T** | **Time** |
| --- | --- | --- |
| Nick Repair | 72°C | 20min |
|  |  |  |
| Denature | 95°C | 5min |
| Denature | 97°C | 15sec |
| Anneal | 60°C | 15sec |
| Extend | 72°C | 60sec |
|  |  | 18 cycles |
| Hold | 70°C | 5min |
| Hold | 4°C | - |

It is possible to optimise the number of PCR cycles if the input DNA is much lower than 1 ng. Purify with magnetic beads using 1.5x sample volume of beads (CleanNA) and keep a 2 µL aliquot before size selection for analysis on a TapeStation 2200 (Agilent Technologies) later.

**Size-selection and DNA purification using SPRI beads**

Magnetic SPRI beads (CleanNA) are used according to the Life Technologies ChIP-seq protocol to size-select the sequencing library. The first round of purification uses a 0.7x sample volume of SPRI beads to selectively capture DNA >350bp, keeping the library DNA in the supernatant. During the second step 80 µL of SPRI beads are used (approx. 0.5x of sample volume), binding all DNA >160bp to the beads. Finally, the library DNA is eluted in 25 μL low TE.

**Quantification & Quality Control**

## We checked the quality of the libraries before and after size selection by running the samples on a High Sensitivity tape on the TapeStation 2200 (Agilent Technologies). We quantified DNA using a 2 µL sample on the Qubit and convert to nM using:

We prepared a dilution of 100pM of pooled libraries ready for sequencing. The emulsion PCR on the Ion Chef requires 50-100pM. At this stage the samples were submitted for sequencing to our colleagues at the Wales Gene Park. The pooled library and individual library preps can be frozen at this point for long term storage.

**Next-generation sequencing using the Ion Proton platform**

The pooled library is subjected to the Ion PITM Hi‐QTM Chef Kit to generate Ion Sphere Particles (IPS) that are loaded onto the Ion PITM Chip v3 for sequencing on the Ion Proton Semiconductor Sequencer (Thermo Fisher Scientific) according to the *Ion PITM Hi‐QTM Chef Kit user guide*, publication number MAN0010967, revision B.0.

# Ion Proton oligonucleotide adapter sequences and annealing

The sequence and specifications of the universal P1 and barcoded A adapters were obtained from: *Ion XpressTM Plus gDNA and Amplicon Library Preparation* Publication Part Number 4471989 Rev. C, Revision Date 3 January 2012 appendix D. The oligos were ordered as ssDNA including the phosphorothioate bonds to protect from degradation and annealed manually. The complementary oligonucleotides were resuspended at equimolar 20 μM concentration in 1x TE complemented with 50 mM NaCl in an end-volume <500 μL. The mixture was heated to 95ºC for 5 minutes in a heat block, after which the heat block was removed from the unit and allowed to cool to 25-30ºC at room temperature (~1h30m). Correct annealing of a single product was confirmed by running a melt-curve protocol on a BioRad iCycler using 1 μL of template. All annealed oligos displayed a single peak in the melting curve around 78-80ºC. The concentration was measured using a NanoDrop 2000 (Thermo Fisher Scientific) and the adapters were stored at -20ºC.

Data analysis

**Data processing**

The trimmed fastq files were aligned to the sacCer3 reference genome using the BWA-MEM 0.7.12-r1039 (Li and Durbin 2010) and piped into SAMtools 0.1.17 (r973:277)
 (Li et al. 2009) to convert the output to a sorted BAM file. These BAM files were used as input for downstream processing using MACS2 and DANPOS (see next section).

# Peak detection of ChIP-seq data using MACS2

In order to perform peak detection with MACS2 (Zhang et al. 2008) of two biological replicates, we merged the sorted bam files (input and IP) using SAMtools as suggested by the MACS2 developer notes before calling peaks. Running MACS2, we set the genome size to 12 x 106, used a bandwidth of 100 bp, allowed for a peak fold-change between 1 and 100 and set the regions that are checked around the peak positions to calculate the maximum local lambda to 2,000 and 100,000.

macs2 callpeak -t IP_merge.bam -c IN_merge.bam -f BAM -g 1.2e7 -n merge -B --bw 100 -q 0.05 -m 1 100 --slocal 2000 --llocal 100000

MACS2 outputs the normalised input and IP traces as bedgraph files and the peak and summit position as tab-delimited data that were loaded in IGB (Freese et al. 2016) for inspection. The peaks called for Abf1 binding in this output are included in Supplementary Table 1 and were used for the annotation and overlap calculations used to characterise the GCBS’s described in the manuscript.

**Nucleosomes Mapping of MNase-seq data using DANPOS**

Aligned MNase-seq data, as sorted bam file format, was submitted to DANPOS (Chen et al. 2013) for mapping nucleosome positions. Submitting multiple datasets to DANPOS allows for fold-change normalisation that compensates for different read-depth or coverage between datasets. Using the MNase-seq data from wild type and *rad16* deleted cells from non-irradiated (-UV) and 0 minutes and 30 minutes post-UV samples, DANPOS successfully and consistently maps ~65,000 nucleosomes for each dataset. DANPOS outputs the statistical information on position, fuzziness and occupancy in a spread-sheet format and produces a wig-file that contains the genome-wide trace of the nucleosome positions. These wig files were accessed through IGB (Freese et al. 2016) for viewing and generating snapshots included in the manuscript. This output was also uploaded to SeqPlots (Stempor and Ahringer 2016) for plotting (see following section). All composite plots described in the manuscript used the data described here.

**Visualisation of genome-wide ChIP-seq, MNase-seq and ChIP-chip data**

Genomic intervals of binding sites, NFRs, motifs or ORFs were uploaded to SeqPlots (Stempor and Ahringer 2016) as canonical BED files. Genome-wide traces of continuous data such as those of MNase-seq and ChIP-seq data were uploaded as wig or bigWig (.bw) files. To convert ChIP-chip and 3D-DIP-chip data into a format that was amenable for plotting we converted the output from Sandcastle (Bennett et al. 2015) the following way. Using the *writeCCT* script from Sandcastle we export the array data in a tab-delimited format. For compatibility we converted the chromosome names to roman numerals using standard command line operations using Perl. This rudimentary BED file can now be converted to a wig file using the UCSC *BedToWig* script (http://genomewiki.ucsc.edu/index.php/File:BedToWig.sh) setting the span to the size of the probes on the array (58bp). Finally, the wig-file was manually converted to a bigWig file using the UCSC wigToBigWig script (http://hgdownload.cse.ucsc.edu/admin/exe/linux.x86_64/wigToBigWig) using a file containing the chromosome sizes from sacCer3 in the process. Some features overlapped and had to be manually corrected and the data that was loaded into SeqPlots. All figures presented in this manuscript were generated using SeqPlots, exported and processed using Adobe Illustrator and Photoshop.

**Defining GG-NER complex binding sites**

The Abf1 binding sites, as detected by MACS2, were loaded in the R-statistical environment and annotated using the ChIPpeakAnno R-package (Zhu et al. 2010). BED files containing the coordinates of the Abf1 binding sites, genome-wide NFRs (Yadon et al. 2010) and Abf1 consensus motifs (Bailey and Elkan 1994; Khan et al. 2018) were loaded using the *BED2RangedData* function. *makeVennDiagram* was used to generate the Venn diagram as shown in Figure 3 and Supplementary Figure S1. Using *annotatePeakInBatch*, ensembl annotation data was used to map the GCBS’s to the nearest genomic features such as TSS or Gene.


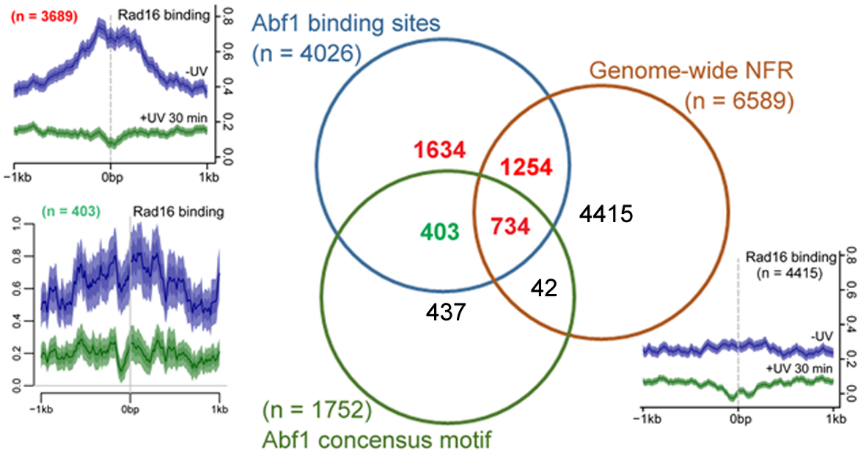
The MACS2 output that detected 4,026 Abf1 binding sites from two biological ChIP-seq repeats, was used in conjunction with genome-wide NFRs (n = 6,589) (Yadon et al. 2010) and Abf1 consensus motifs (n = 1,752) to generate a three-way Venn diagram to find the genomic positions where these features overlap using ChIPpeakAnno (Zhu et al. 2010). This initial attempt to define GCBSs, did not include Rad16 binding sites identified from ChIP-chip data (n = 1,652) because the resolution of microarray data is such that the size of genomic intervals detected as peaks is at least 1 order of magnitude bigger than the features under investigation here. Therefore, multiple Abf1 binding sites, NFRs or motifs would overlap with a single Rad16 binding site, eliminating the high-resolution information obtained from the Abf1 ChIP-seq data. Supplementary method Figure 1 shows the resulting three-way Venn diagram. The list of 4 subcategories of Abf1 binding sites (highlighted in red and green) were used to plot Rad16 occupancy from our previous ChIP-chip data (Yu et al. 2016). Of all classes of Abf1 binding sites, the 403 sites (highlighted in green), did not show any significant enrichment of Rad16. Therefore, this group of Abf1 binding sites that contain a motif but are not positioned at NFRs, do not qualify as GCBSs and are likely genomic positions where Abf1 executes its other functions not related to repair. The other 3 groups of Abf1 binding sites are individually (data not shown) and collectively enriched for Rad16 as shown by the insert in Supplementary method Figure 1 displaying the Rad16 occupancy at the combined 3689 positions. As a negative control we also plotted the Rad16 occupancy at the 4415 NFRs that do not contain Abf1 binding sites or motifs. These positions do not qualify as a GCBS by these criteria and we therefore find no enrichment for Rad16 at these sites as expected. This selects the first high-level set of GCBS’s.

Supplementary method Figure 1 - Venn diagram to classify Abf1 binding sites into categories based on the overlap between NFRs (n = 6589) and/or Abf1 consensus motifs (n = 1752) allowing no gap between the features. Inserts show Rad16 enrichment using ChIP-chip data. The GG-NER complex occupancy at the subcategories is highlighted in red.

**Annotating GG-NER complex binding sites using ChIPpeakAnno**

*
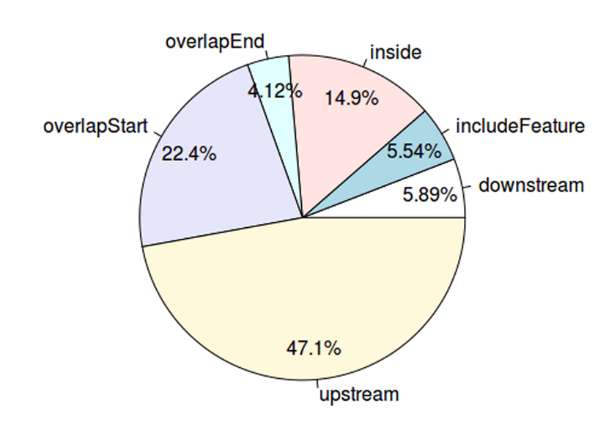
*As described in the methods sections, we used the R-package *ChIPpeakAnno* (Zhu et al. 2010) to annotate the set of 3,689 GCBS’s we selected based on the presence and/or absence of NFRs and motif sequence. We found that these GCBS positions are enriched for the *upstream* and *overlapStart* annotation when considering their position relative to ORFs. This is in line with our previous findings (Yu et al. 2016). The *downstream*, *overlapEnd*, *inside* or *includeFeature* were less frequently present in this group of GCBSs. Supplementary method Figure 2 shows a pie chart of the distribution of the different orientations of GCBSs in relation to gene structure.

Supplementary method Figure 2 – First-order GCBS’s are annotated according to their location in relation to nearest gene. Categories of annotation refer to upstream of genes (*overlapStart, upstream*), inside of genes (*inside*), genes inside the binding site (*includeFeature*) and downstream of genes (*overlapEnd, downstream*) (Zhu et al. 2010).

***K*-means clustering and heatmap plotting**

Analysing the aggregate nucleosome positions around GCBS’s (n = 2,664) in the context of gene structure revealed that the +1 nucleosome sits almost exactly over the TSS in this representation. This atypical conformation could be unique to these positions or be an artefact of composite plotting. In order to reveal if the orientation between the TSS, NFR and Abf1 binding sites are uniquely positioned at a certain class of GCBS’s, we selected those GCBS’s that overlap with an NFR. From the total list of GCBS’s we obtained a subset of 1,985 sites that map to an NFR. The nucleosome structure around the remaining GCBS’s will still reveal a nucleosome depleted region, but are less pronounced and are not detected as NFR as a consequence (data not shown). With no NFR detected at these sites, it is impossible to generate nucleosome maps with the NFR as a frame of reference. Therefore, we selected the set of unique NFR positions and accompanying genes annotated to these positions to obtain a list of TSS and NFR positions to perform this analysis (n = 1,887). Next, we generated a heatmap of nucleosome occupancy around the GCBS/NFR positions aligned at the corresponding TSS or centred around the NFR using Seqplots
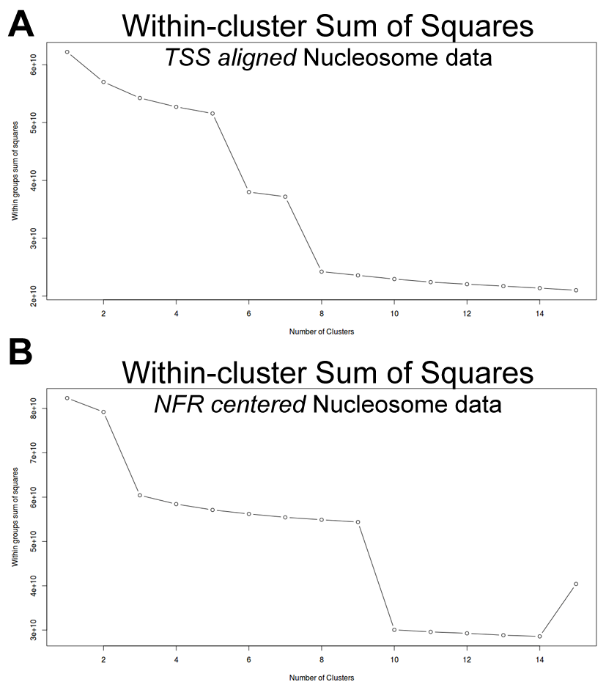
(Stempor and Ahringer 2016). This data was then imported into the R statistical environment and we used the *NbClust* R-package to assess the *K*-mean clusters (Charrad et al. 2014). The intra-cluster variation was calculated by the within-cluster sum of squares (WSS) using the *wssplot* function. The optimal amount of clusters is reached when this parameter is minimised summarised in Supplementary method Figure 3. The *NbClust* package further evaluates the optimal number of clusters for *K*-means clustering using another 25 criteria. Based on these findings and visual inspection of the heatmaps, we selected 13 clusters for K-means calculations aligned at TSS’s and 4 clusters for the NFR centred data. This resulted in the heatmaps shown in Supplementary Figure S3 (note that in A, 2 clusters contain only 1 trace, leaving 11 visible clusters on the heatmap).

Supplementary method Figure 3 – K-means cluster optimisation using *NbClust*. Shown here are the number of criteria (y-axis) that calculate the best-fit for the chosen number of clusters (x-axis) of the (A) TSS aligned and (B) NFR centred nucleosome data.

**NFR detection using HOMER**

We performed NFR detection guided by the HOMER documentation (found at <http://homer.ucsd.edu/homer/ngs/peaks.html>) (Heinz et al. 2010). First, we optimised the nucleosome detection of our data to match the >60,000 nucleosomes detected using DANPOS (see main manuscript). Next, we used the nucleosomes detected by HOMER to perform the NFR detection using the *-nfr* tag on two replicate MNase-seq datasets.

To enable nucleosome detection using HOMER the aligned data (.bam format) was converted into a *tagDirectory* using the *makeTagDirectory* function as follows:

makeTagDirectory /Data/Experiment -format sam

/DATA/Experiment/WTU_bwa.sorted.bam

This generates a *TagDirectory* folder in /Data/Experiment that HOMER can use for nucleosome detection. Next, the *findPeaks* function was used to detect nucleosomes in our wildtype untreated MNase-seq data:

findPeaks /Data/Experiment/TagDirectory -style histone -size 180 -minDist 10 -fdr 0.22 -F 0 -L 0 -C 0 -o auto

The false discovery rate was fine-tuned to achieve a similar nucleosome detection compared to DANPOS, which maps between 60,000 to 70,000 nucleosomes. After this optimisation, the algorithm can be repeated with the inclusion of the *-nfr* tag to detect NFRs. We performed this analysis on two MNase-seq datasets and detected 9,500 and 10,000 NFRs, respectively. Finally, we combined the bed-files and selected only those that are in common between these using BEDTools (Quinlan and Hall 2010) to calculate the intersection:

bedtools intersect -a WT_Nucl-UV.NFR_1.bed -b WT_Nucl-UV.NFR_2.bed > WTU_NFR_merged.bed

This process also flattens the bed file at positions where HOMER calls multiple NFRs at a single genomic location, resulting in a merged bed file that contains 5,556 NFR positions. This NFR detection results in ~1,100 fewer positions being mapped compared to literature (Yadon et al. 2010). To test whether this affected the GCBS annotation we performed earlier, we generated the same three-way Venn diagram as shown in Figure 1 with the detected NFRs and find very similar numbers of overlap (data not shown). The majority of the ~1,100 NFRs that we fail to detect using HOMER, are contained within the 4,415 class of NFRs that do not map to an Abf1 binding site or consensus sequence (Figure S1). Moreover, this group of ~1,100 NFRs are enriched for those NFRs that reside inside ORFs that are generally difficult to detect (data not shown). Taken together, the detected NFRs do not alter the GCBS classification performed earlier using literature annotated NFRs (Yadon et al. 2010).

**Sorting GCBS’s by NFR size**

We observed that Abf1 chromatin occupancy around GCBS’s is slightly asymmetric, with a shoulder to the left-side of the GCBS, upstream relative to the nearest ORF. In order to investigate whether this feature of the data represents Abf1 binding at distinct confirmations both at the -1 nucleosome *and* the NFR or relates to the occupancy of Abf1 at broader NFRs, we sorted the GCBS positions by NFR size and plotted the nucleosome and Abf1 ChIP-seq data as a heatmap around these positions. To do this we selected the NFRs that overlap with our list of GCBS’s. The list of Abf1 binding sites (n = 4,026) overlaps with 1,985 genome-wide NFRs (Yadon et al. 2010) in a pairwise analysis (Figure S1). During the overlap calculations and annotation using ChIPpeakAnno (Zhu et al. 2010), duplicate NFR or gene entries are introduced when 2 NFRs overlap with a single Abf1 binding site, or when the same gene gets annotated to 2 different Abf1 binding sites (i.e. 1 upstream and 1 downstream). Therefore, in order to retrieve a list of unique NFRs and TSSs we eliminated the duplicates that this process can generate, resulting in a list of 1,766 unique genes and accompanying NFRs. The heatmap representing nucleosome occupancy at these positions was generated using SeqPlots (Stempor and Ahringer 2016), and imported this into the R statistical environment (R Core Team 2017) to sort the data by NFR size. After this we were able to plot the heatmap again, this time using R (*ggplot2, gridExtra* and reshape) to generate Figure S5.

**Micro-C data processing and plotting**

Datasets from the Micro-C XL experiments were retrieved from the ENA repository (Study PRJNA336566) (Hsieh et al. 2016). From the double cross-linked data available we used the dataset that represents the 3% FA and 3mM DSG 40-minute cross-linked data (SRR4000672) for plotting Figure 3. We use HiC pro to align the data, build the contact maps, normalise the data and QC, following the instruction of the authors (https://github.com/nservant/HiC-Pro and enclosed documentation). Next, we used HiC-plotter (Akdemir and Chin 2015) to visualise the Micro-C XL data in conjunction with our MNase-seq and ChIP-seq data.

**References**

Akdemir KC, Chin L. 2015. HiCPlotter integrates genomic data with interaction matrices. *Genome Biol* **16**: 198.

Bailey TL, Elkan C. 1994. Fitting a mixture model by expectation maximization to discover motifs in biopolymers. *Proceedings International Conference on Intelligent Systems for Molecular Biology* **2**: 28-36.

Bennett M, Evans KE, Yu S, Teng Y, Webster RM, Powell J, Waters R, Reed SH. 2015. Sandcastle: software for revealing latent information in multiple experimental ChIP-chip datasets via a novel normalisation procedure. *Scientific reports* **5**: 13395.

Charrad M, Ghazzali N, Boiteau V, Niknafs A. 2014. Nbclust: An R Package for Determining the Relevant Number of Clusters in a Data Set. *J Stat Softw* **61**: 1-36.

Chen K, Xi Y, Pan X, Li Z, Kaestner K, Tyler J, Dent S, He X, Li W. 2013. DANPOS: dynamic analysis of nucleosome position and occupancy by sequencing. *Genome research* **23**: 341-351.

Freese NH, Norris DC, Loraine AE. 2016. Integrated genome browser: visual analytics platform for genomics. *Bioinformatics* **32**: 2089-2095.

Heinz S, Benner C, Spann N, Bertolino E, Lin YC, Laslo P, Cheng JX, Murre C, Singh H, Glass CK. 2010. Simple combinations of lineage-determining transcription factors prime cis-regulatory elements required for macrophage and B cell identities. *Molecular cell* **38**: 576-589.

Hsieh THS, Fudenberg G, Goloborodko A, Rando OJ. 2016. Micro-C XL: assaying chromosome conformation from the nucleosome to the entire genome. *Nat Methods* **13**: 1009-+.

Kent NA, Adams S, Moorhouse A, Paszkiewicz K. 2011. Chromatin particle spectrum analysis: a method for comparative chromatin structure analysis using paired-end mode next-generation DNA sequencing. *Nucleic acids research* **39**: e26.

Khan A, Fornes O, Stigliani A, Gheorghe M, Castro-Mondragon JA, van der Lee R, Bessy A, Cheneby J, Kulkarni SR, Tan G et al. 2018. JASPAR 2018: update of the open-access database of transcription factor binding profiles and its web framework. *Nucleic acids research* **46**: D260-D266.

Li H, Durbin R. 2010. Fast and accurate long-read alignment with Burrows-Wheeler transform. *Bioinformatics* **26**: 589-595.

Li H, Handsaker B, Wysoker A, Fennell T, Ruan J, Homer N, Marth G, Abecasis G, Durbin R, Genome Project Data Processing S. 2009. The Sequence Alignment/Map format and SAMtools. *Bioinformatics* **25**: 2078-2079.

Quinlan AR, Hall IM. 2010. BEDTools: a flexible suite of utilities for comparing genomic features. *Bioinformatics* **26**: 841-842.

R Core Team. 2016. *R: A Language and Environment for Statistical*

*Computing.* R Foundation for Statistical Computing, Vienna, Austria. https://www.R-project.org

Reed SH, You Z, Friedberg EC. 1998. The yeast RAD7 and RAD16 genes are required for postincision events during nucleotide excision repair. In vitro and in vivo studies with rad7 and rad16 mutants and purification of a Rad7/Rad16-containing protein complex. *The Journal of biological chemistry* **273**: 29481-29488.

Stempor P, Ahringer J. 2016. SeqPlots - Interactive software for exploratory data analyses, pattern discovery and visualization in genomics. *Wellcome open research* **1**: 14.

Yadon AN, Van de Mark D, Basom R, Delrow J, Whitehouse I, Tsukiyama T. 2010. Chromatin remodeling around nucleosome-free regions leads to repression of noncoding RNA transcription. *Molecular and cellular biology* **30**: 5110-5122.

Yu S, Evans K, van Eijk P, Bennett M, Webster RM, Leadbitter M, Teng Y, Waters R, Jackson SP, Reed SH. 2016. Global genome nucleotide excision repair is organized into domains that promote efficient DNA repair in chromatin. *Genome research* **26**: 1376-1387.

Zhang Y, Liu T, Meyer CA, Eeckhoute J, Johnson DS, Bernstein BE, Nusbaum C, Myers RM, Brown M, Li W et al. 2008. Model-based analysis of ChIP-Seq (MACS). *Genome Biol* **9**: R137.

Zhu LJ, Gazin C, Lawson ND, Pages H, Lin SM, Lapointe DS, Green MR. 2010. ChIPpeakAnno: a Bioconductor package to annotate ChIP-seq and ChIP-chip data. *BMC bioinformatics* **11**: 237.
